1 **Comparative effectiveness of the BNT162b2 vs ChAdOx1 vaccine against Covid-19**

2 **Authors**

3 Junqing xie,<sup>1</sup> Shuo Feng,<sup>2</sup> Xintong Li,<sup>1</sup> Ester Gea-Mallorquí,<sup>3</sup> Albert Prats-Urbe,<sup>1</sup> Dani Prieto-  
4 Alhambra<sup>1</sup>

- 5 1. Centre for Statistics in Medicine, NDORMS, University of Oxford, Oxford, UK  
6 2. Oxford Vaccine Group, Department of Paediatrics, University of Oxford, UK  
7 3. Nuffield Department of Clinical Medicine, University of Oxford, Oxford, UK

8 Corresponding author: Prof Daniel Prieto-Alhambra, Botnar Research Centre, Windmill Road,  
9 OX37LD, Oxford, UK, [daniel.prietoalhambra@ndorms.ox.ac.uk](mailto:daniel.prietoalhambra@ndorms.ox.ac.uk)

10 **Abstract**

11 Although pivotal trials with varying populations and study methods suggest higher efficacy for mRNA  
12 than adenoviral Covid-19 vaccines, no direct evidence is available. Here, we conducted a head-to-  
13 head comparison of BNT162b2 versus ChAdOx1 against Covid-19. We analysed 235,181 UK Biobank  
14 participants aged 50 years or older and vaccinated with one or two doses of BNT162b2 or ChAdOx1.  
15 People were followed from the vaccination date until 18/10/2021. Inverse probability weighting was  
16 used to minimise confounding and the Cox models to derive hazard ratio. We found that, compared  
17 with two doses of ChAdOx1, vaccination with BNT162b2 was associated with 30% lower risks of both  
18 SARS-CoV-2 infection and related hospitalisation during the period dominated by the delta variant.  
19 Also, this comparative effectiveness was consistent across several subgroups and persisted for at  
20 least six months, suggesting no differential waning between the two vaccines. Our findings can  
21 inform evidence-based Covid-19 vaccination campaigns and booster strategies.

22

23 **Introduction**

24 To date, four vaccines against the Coronavirus disease 2019 (Covid-19) have been approved for use  
25 in the UK by the Medicines and Healthcare products Regulatory Agency: the Pfizer-BioNTech  
26 BNT162b2, Moderna's mRNA-1273, Oxford-AstraZeneca's ChAdOx1, and Janssen's Ad26.CoV2.S.  
27 Although phase 3 trials suggested that all four have high clinical efficacy, mRNA vaccines  
28 demonstrated numerically greater efficacy than adenoviral-based ones: BNT162b2 reported 95%  
29 efficacy against symptomatic covid-19,<sup>1</sup> mRNA-1273 94.1% efficacy,<sup>2</sup> whilst ChAdOx1 had 70.4%,<sup>3</sup>  
30 and Ad26.CoV2.S had 66.9% efficacy.<sup>4</sup> However, notable differences in study designs made it difficult  
31 to compare vaccine efficacy based on these trials, including different populations recruited in  
32 different regions and at different times, diverse primary endpoint definitions, and heterogeneous  
33 statistical analysis methods.

34 Specific for the two more widely utilized vaccines, BNT162b2 and ChAdOx1, several observational  
35 studies have recently evaluated their effectiveness in multiple real-world settings from Israel,<sup>5</sup> the  
36 UK,<sup>6</sup> and Spain,<sup>7</sup> amongst others. Although useful, none of these studies conducted head-to-head  
37 comparisons of vaccine effectiveness. With the ongoing pandemic and rapid rollout of the Covid-19  
38 vaccination programme all over the world, evidence on their comparative performance has become  
39 more crucial to inform policy decisions on optimizing vaccine implementation strategies, not only in  
40 countries where greater coverage of the prime dose is urgently required or in countries where boost  
41 doses and sequential immunization are being considered. Therefore, this study aimed to estimate  
42 the comparative effectiveness of BNT162b2 vs ChAdOx1 vaccines against Covid-19 infection and  
43 hospitalization in a large and rich prospective cohort of people aged 50 years or older.

44

45

## 46 **Results**

### 47 *Data linkage and study cohorts*

48 During the one-dose enrolment period, 70,097 and 98,551 people received the first BNT162b2 and  
49 ChAdOx1 Covid-19 vaccines, respectively. These figures were 67,813 and 89,030 accordingly for  
50 people receiving the second dose during the two-dose enrolment period. Vaccine uptake over  
51 calendar time in our study population is depicted in **Figure 1**.

### 52 *Baseline characteristics*

53 In the one-dose vaccine cohorts, people receiving BNT162b2 were slightly older (mean (sd) age:  
54 71.35 (7.21) years) than those receiving ChAdOx1 (mean (sd) age: 71.06 (6.02) years ). Sex (44.5% vs  
55 44.1% male) and ethnicity (91.2% vs 92.6% White) were comparable between the two groups. Little  
56 difference was seen in the prevalence of medicines or comorbidities. The main differences between  
57 cohorts were vaccination dates and socio-economic factors such as income (**Figure 2** and  
58 **Supplementary Table 2**). Similar patterns of baseline characteristic differences were also seen in the  
59 two-dose comparison cohorts (**Figure 2** and **Supplementary Table 3**). All covariates were balanced  
60 after IPW weighting with an absolute standardised mean difference < 0.1, including the date of  
61 vaccination.

### 62 *Incidence and hazard ratio*

63 Over the 14,630 and 20,714 person-years of follow-up for the one dose BNT162b2 and ChAdOx1  
64 recipient, 200 and 261 people tested positive for SARS-CoV-2, equivalent to incidence rates (IR) of  
65 13.7 and 12.6/1,000 person-years, respectively, and an unadjusted hazard ratio (HR) of 1.08 (95%  
66 0.90 - 1.30). After inverse probability weighting, the HR changed to 0.72 (95% 0.58 - 0.88), favouring  
67 BNT162b2 in the overall population (**Table 1**). In contrast, the incidences of Covid-19 hospitalisation  
68 were similar among the one dose BNT162b2 (IR: 3.07 per 1,000 person-years) and ChAdOx1 (IR: 2.17  
69 per 1,000 person-years) cohorts, with no noticeable differences between both vaccine groups:  
70 adjusted/weighted HR 0.87 (95% 0.53 - 1.41).

71 After the second dose, 1,361/34,991 person-years (IR: 38.9 per 1,000 person-years) and  
72 2,497/44,084 person-years (IR: 56.6 per 1,000 person-years) were identified positive for SARS-CoV-2  
73 among BNT162b2 and ChAdOx1 recipients respectively. Unadjusted (0.72, 95% 0.57 - 0.91) and  
74 adjusted HR (0.70, 95% 0.65 - 0.75) were almost identical, favouring BNT162b2 (**Table 1**). The rates  
75 of Covid-19 hospitalisation remained low in both cohorts, but higher amongst ChAdOx1 (IR: 4.55 per  
76 1,000 person-years) compared to BNT162b2 recipients (IR: 3.47 per 1,000 person-years), with  
77 adjusted HR of 0.71 (95% 0.55 - 0.90) favouring BNT162b2.

### 78 *Kaplan–Meier curve of Covid-19 infection and hospitalisation*

79 Kaplan–Meier curves stratified by vaccine depicted similar trends between Covid-19 infection and  
80 hospitalisation. The cumulative incidence after the first dose increased rapidly in the early follow-up  
81 but flattened later until 14 weeks after vaccination (**Figure 3**), corresponding to the calendar period  
82 from January to March 2021 (**Supplementary Figure 1**). Conversely, the trend of cumulative  
83 incidence was reversed for the two-dose cohorts, with a substantial increase starting 12 weeks after  
84 the second dose (Figure 3), corresponding to the calendar period from June to October 2021  
85 (**Supplementary Figure 1**). Changes in community transmission over time in the general population  
86 of England and among UK Biobank participants are shown in **Supplementary Figure 1**.

### 87 *Comparative effectiveness across sub-populations and over-time*

88 The risk of Covid-19 infection was consistently lower in people receiving two doses of BNT162b2  
89 compared to those receiving two doses of ChAdOx1 across all strata. HRs ranged from 0.65 (95%  
90 0.59 - 0.71) for females to 0.80 (95% 0.70 - 0.90) for oldest-old adults.

91 Notably, incidence rates of Covid-19 infection increased substantially during the study period, from  
92 3.93 and 4.87 per 1,000 person-years at the 0–4-week window to 74.74 and 111.87 per 1,000  
93 person-years at the >24-week window in BNT162b2 and ChAdOx1 cohorts, respectively. However,  
94 as reflected by HRs, the comparative risks were stable for at least six months (**Figure 4**). Although a  
95 similar pattern was observed for Covid-19 hospitalisation, power was limited for the time-split  
96 analysis, in particular for the 0–4-week window (HR: 0.16, 95% 0.02 - 1.54) and 4–8-week window  
97 (HR: 2.48, 95% 0.16 - 39.66), due to the extremely rare events observed in the first few weeks after  
98 the second vaccination (**Figure 4**).

99 *Negative control and sensitivity analyses*

100 Adjusted hazard ratios for proposed negative clinical outcomes according to vaccine received among  
101 the one dose cohort were 1.01 (0.95 to 1.17) for limb pain, 0.93 (0.82 to 1.05) for fracture, and 0.88  
102 (0.51 to 1.51) for peptic ulcer.

103 The main results were consistent in the propensity score-matched cohorts with slightly wider  
104 confidence intervals (**Supplementary Table 4**).

105 Main tables and figures

106 Figure 1: The number of people receiving either BNT162b2 or ChAdOx1 Covid-19 vaccine in the study cohort from Dec 01, 2020 to Sep 21, 2021.

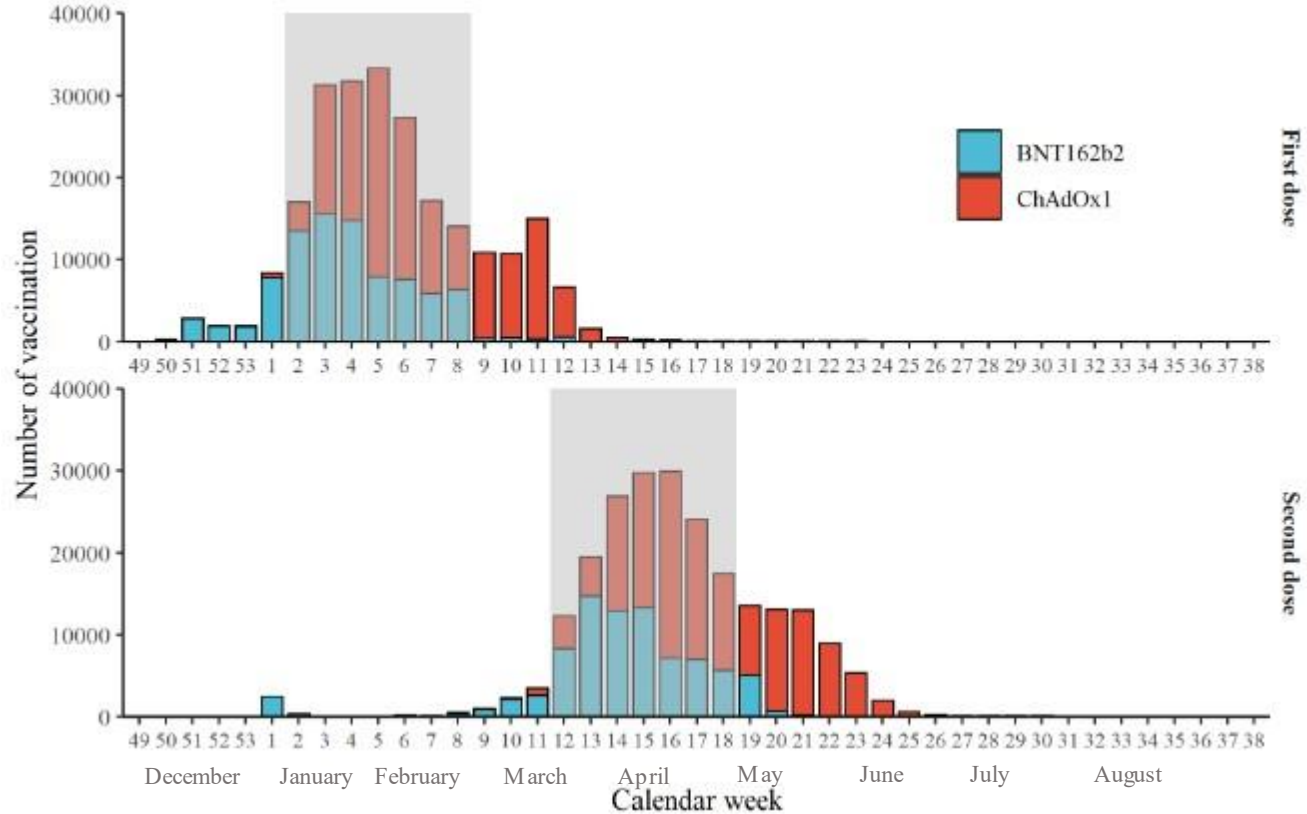

107

108 The rectangle background with grey color depicts the vaccination anchor windows. Only people who received study vaccines within the anchor windows  
 109 were included for the comparative analysis. We defined the 2<sup>nd</sup> to 8<sup>th</sup> (Jan 11, 2021 to Feb 28, 2021) and 12<sup>th</sup> to 18<sup>th</sup> (March 22, 2021 to May 9, 2021)  
 110 calendar weeks as the two anchor windows for the one-dose and two-dose cohorts, respectively. The decision-making for these anchor windows was based  
 111 on (1) there were both BNT162b2 and ChAdOx1 vaccines delivered in each epidemiological week of the window, (2) numbers of the two vaccines were  
 112 generally comparable, and (3) UK's policy on the gap between the first and second dose was 10 to 12 weeks for both vaccines.

113

114 **Figure 2: Balance of baseline covariates for the one dose and two doses cohorts, before and after weighting.**

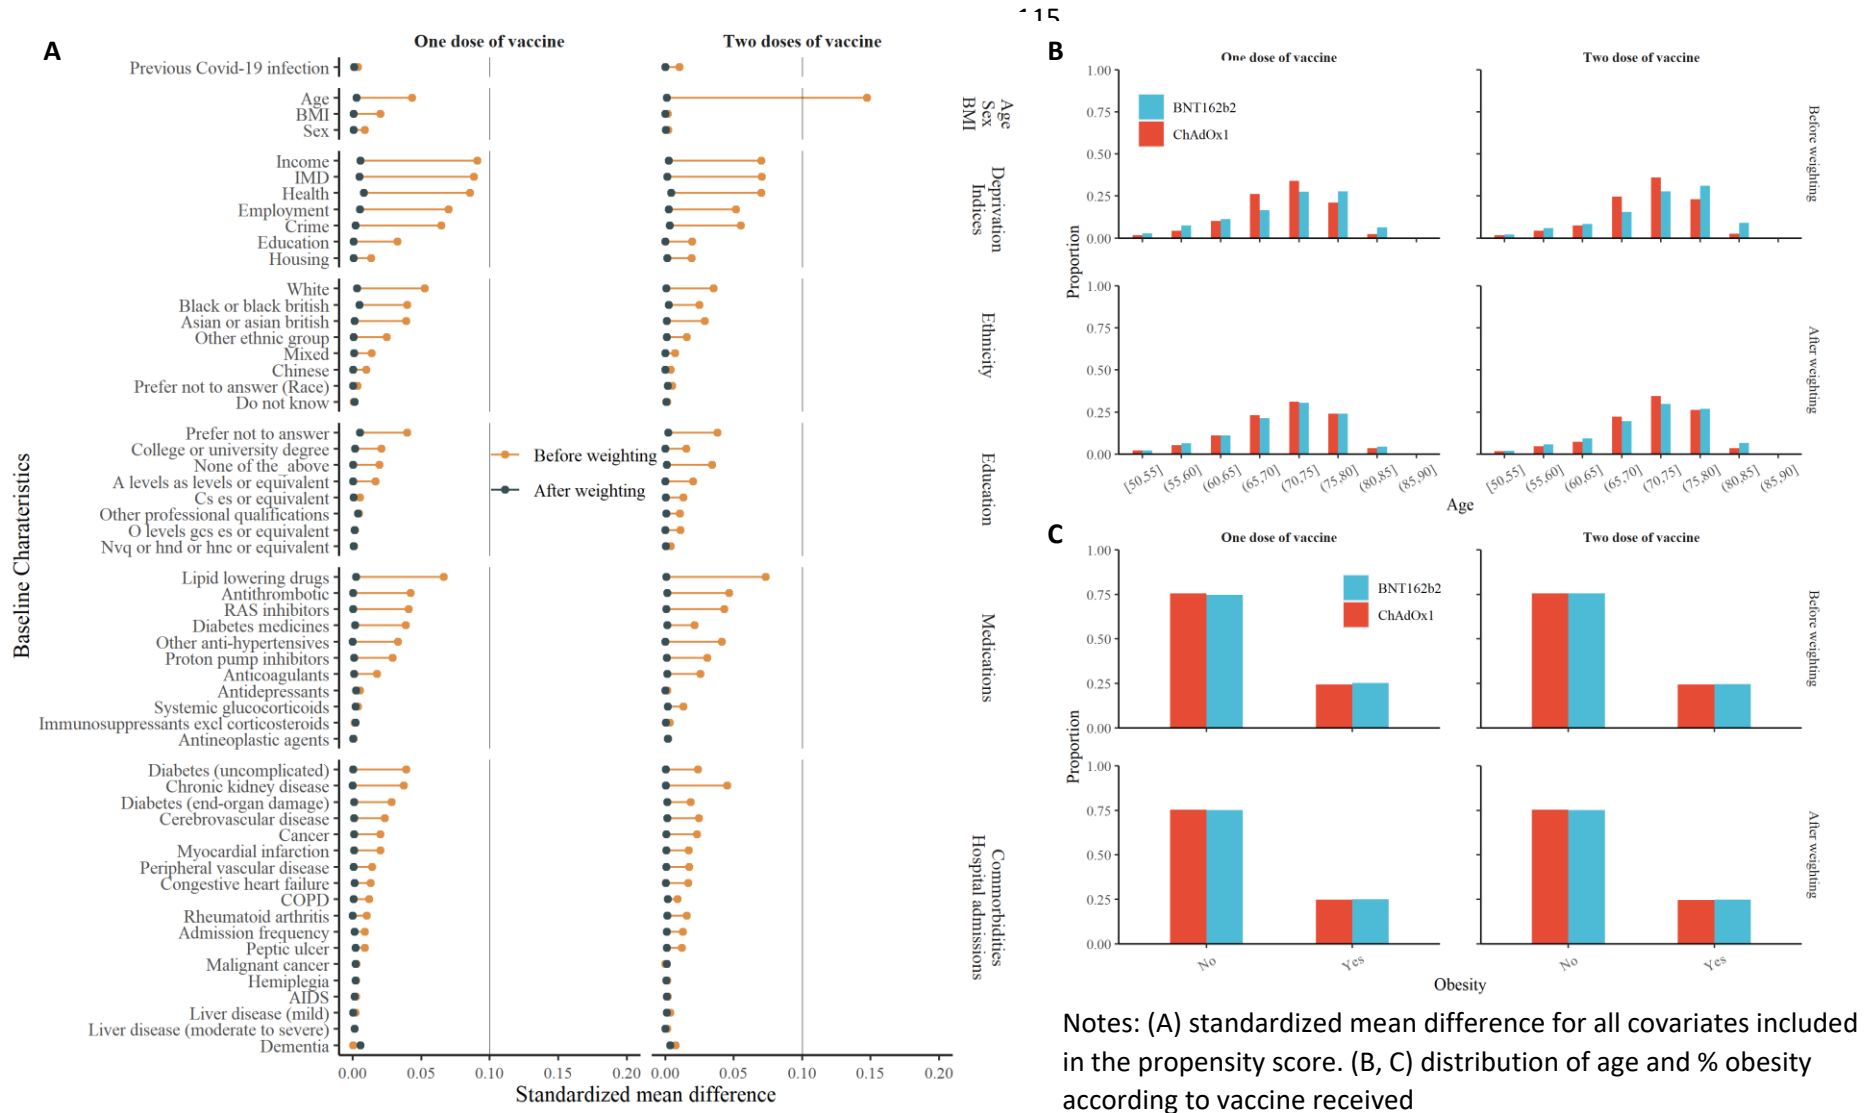

Notes: (A) standardized mean difference for all covariates included in the propensity score. (B, C) distribution of age and % obesity according to vaccine received

119

120 **Table 1: Incidence rate and hazard ratio of COVID-19 infection and hospitalisation following one and two doses of vaccines.**

121

|                          | BNT162b2          |       |                    | ChAdOx1           |       |                    |                         |                       |
|--------------------------|-------------------|-------|--------------------|-------------------|-------|--------------------|-------------------------|-----------------------|
|                          | Vaccination years | Cases | Rate, per 1000 PYs | Vaccination years | Cases | Rate, per 1000 PYs | Unadjusted hazard ratio | Adjusted hazard ratio |
| One dose                 |                   |       |                    |                   |       |                    |                         |                       |
| Covid-19 infection       | 14630             | 200   | 13.7               | 20714             | 261   | 12.6               | 1.08 (0.90 - 1.30)      | 0.72 (0.58 - 0.88)    |
| Covid-19 hospitalisation | 14654             | 45    | 3.07               | 20746             | 45    | 2.17               | 1.41 (0.95 - 2.09)      | 0.87 (0.53 - 1.41)    |
| Two doses                |                   |       |                    |                   |       |                    |                         |                       |
| Covid-19 infection       | 34991             | 1361  | 38.9               | 44084             | 2497  | 56.6               | 0.72 (0.57 - 0.91)      | 0.70 (0.65 - 0.75)    |
| Covid-19 hospitalisation | 35176             | 122   | 3.47               | 44421             | 202   | 4.55               | 0.66 (0.62 - 0.71)      | 0.71 (0.55 - 0.90)    |

122 PYs: person-years

123

124

125 **Figure 3: Kaplan-Meier cumulative incidence curves of Covid-19 infection and hospitalization after one and two doses of vaccines.**

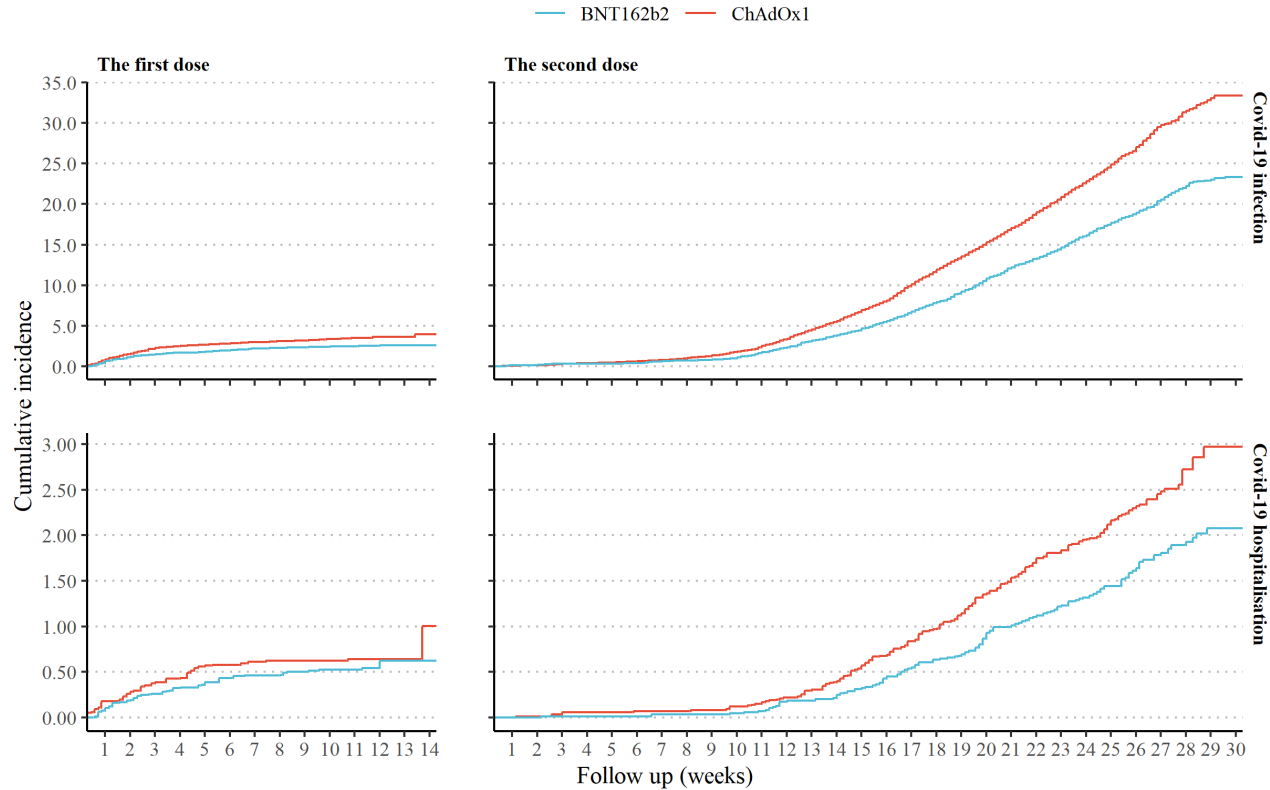

126  
 127 Notes: The different Y-axis scales for Covid-19 infection and hospitalisation outcomes. The longest follow-up was 14 weeks after the first dose and 30 weeks  
 128 after the second dose of the vaccine.  
 129

130



131 **Figure 4: Comparative effectiveness of two doses BNT162b2 vs ChAdOx1 vaccine on Covid-19 infection and hospitalisation across key subgroups and**  
 132 **over time.**

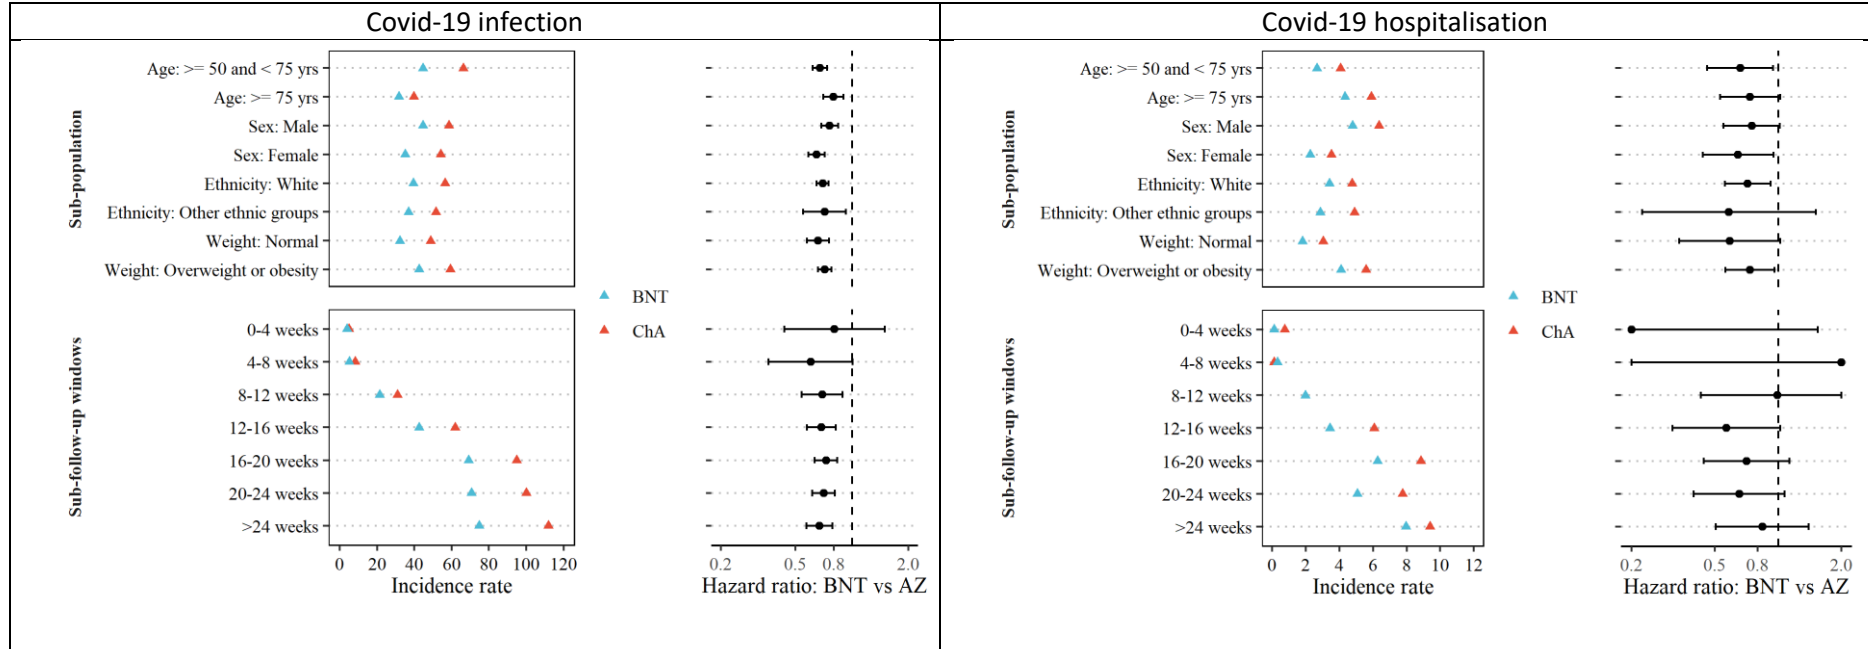

133 Notes: The different X-axis range of incidence rate for the Covid-19 infection and hospitalisation outcomes (unit, per 1000 person-years). Hazard ratios for  
 134 Covid-19 hospitalisation were truncated at 0.2 (lowest) and 2 (highest).

135

136

137

138

## 139 Discussion

140 Among adults aged 50 years and older, we found that people receiving two doses of BNT162b2  
141 vaccine had 30% lower risks of both Covid-19 diagnosis and related hospital admission, compared  
142 with those vaccinated with ChAdOx1. A similar difference was also observed among the one dose  
143 recipients, yet, only for Covid-19 diagnosis. Notably, the two-dose comparative effectiveness was  
144 consistent across several high-risk groups, such as oldest-old,<sup>7</sup> male,<sup>8</sup> ethnic minority<sup>9</sup> and those with  
145 overweight or obesity,<sup>10</sup> and persisted over time for over six months.

146 To date, only two Phase 2 randomized controlled trial has directly compared the efficacy of mRNA  
147 with adenovirus-based Covid-19 vaccines by using immunogenic endpoints. Liu et al.<sup>11</sup> found that  
148 the BNT162B2-BNT162B2 appeared more immunogenic than the ChAdOx1-ChAdOx1 schedule, with  
149 higher levels of antibodies at 28 days after the first and second dose. A similar finding was reported  
150 in the Borobia et al. study comparing the heterologous BNT162B2-ChAdOx1 and the homogenous  
151 ChAdOx1-ChAdOx1 vaccine regimens.<sup>12,13</sup> In line with this evidence, our study showed a lower risk of  
152 Covid-19 outcomes in people vaccinated with BNT162b2 overall and across subgroups.

153 However, a recent preprint study by Hulme et al.<sup>14</sup> showed no difference among recipients of these  
154 two vaccines regarding the risk of SARS-CoV-2 positive test, COVID-19 related accident & emergency  
155 attendance and hospital admission. Several fundamental factors might explain the disagreement  
156 with our results. First, Hulme's study only included health and social care workers who are more  
157 likely to be exposed to SARS-CoV-2 than our cohort: a community-based "healthy volunteer"  
158 population,<sup>15</sup> which was corroborated by the higher infection rate in their study (58 per 1,000  
159 person-years) compared to ours (~13 per 1,000 person-years) during the first few weeks following  
160 the first dose. Second, both our and Hulme's studies found that, on average, vaccination with  
161 BNT162B2 happened earlier than ChAdOx1. Given the variation over time in community  
162 transmission in England (**Supplementary Figure 1**), insufficient control for vaccination date can result  
163 in an inflated risk of COVID-19 amongst BNT162B2 recipients. Informed by this, we observed a  
164 substantial change of hazard ratio after the complete alignment of the first vaccination date by  
165 weighting in our study. Thirdly, Hulme's risk assessment period started from the first dose (January  
166 to February 2021) and ended on 13 June 2021, reflecting a mixed effect of one and two doses of  
167 vaccines.

168 Finally, our data for the first time demonstrated that the observed differences did not attenuate  
169 over time, verifying the hypothesis from a few recent preprint studies.<sup>16,17</sup>

### 170 *Strengths and limitations*

171 The leading challenges in estimating vaccine effectiveness with observational data lies in  
172 confounding by indication and potentially differential testing rates between exposed vaccinated and  
173 unvaccinated populations.<sup>18,19</sup> However, our study minimized the impact of such differences by  
174 comparing two vaccines and restricting the analysis to a period when both vaccines were available  
175 and had a similar national delivery. UK data are ideal for comparative effectiveness research into  
176 Covid-19 vaccines, as both BNT162b2 and ChAdOx1 were rolled out simultaneously for the target  
177 population (adults ≥ 50 years) included in our analyses.<sup>20 21,22</sup>

178 However, additional limitations remain. Information on a few participants' characteristics was  
179 collected ten years ago and may have changed since then. However, given that all people at the  
180 cohort recruitment were already middle-aged or older adults (40-69 years old), we expected any  
181 changes in those features such as socio-economic status and education are likely to be minor or  
182 unrelated to the choice of vaccine types. Admittedly, misclassification of covariates could bias the

183 genuine association towards the null and lead to underestimating the comparative vaccine  
184 effectiveness. Our study has several unique strengths. First, the granularity of UK Biobank data and  
185 comprehensive linkage to external data sources allowed us to measure and control for an extensive  
186 array of confounders, including demographics, socio-economic deprivation, comorbidity, and  
187 medication usage. Our negative control outcome analyses provided reassurance that no significant  
188 residual confounding remained after adjusting the mentioned covariates using IPW methods.  
189 Secondly, the proposed study outcomes (Covid-19 and related hospitalization) were identified  
190 through linkage to official national databases of tests and hospital inpatient data, minimising the risk  
191 of misclassification. Finally, the sample size of our cohort triplicated that of the largest phase III  
192 trials, enabling us to detect differences in hospital admission rates, which seemed underpowered in  
193 randomized trials.

#### 194 *Conclusions*

195 Our findings support evidence from pivotal trials suggesting that BNT162b2 provides additional  
196 protection against Covid-19 and hospitalisation than ChAdOx1 vaccination. For the first time, we  
197 demonstrated that this comparative effectiveness endured over six months when the Delta variant  
198 was predominant, and community transmission kept increasing in the UK. These findings highlight  
199 the importance of continuous monitoring of the effectiveness of different vaccines against emerging  
200 SARS-CoV-2 variants to inform future booster campaigns and vaccine combinations strategies.

201

202

203

## 204 **Methods**

### 205 ***Study population and design***

206 We used data from the UK Biobank (UKBB) cohort, a prospective study of approximately 500,000  
207 individuals aged between 40 and 69 at baseline recruited in 2007-2010 from England (89%), Scotland  
208 (7%) and Wales (4%). All participants provided comprehensive information on socio-demographic,  
209 lifestyle, and health-related factors, which has been described in detail elsewhere.<sup>23</sup>

210 In this study, we analysed participants from England, as vaccination data for Scotland and Wales  
211 were not available. Although vaccination started in early December 2020 in the UK, we restricted our  
212 analyses to periods when both vaccines were rolled out to maximise comparability in individual- and  
213 population-level characteristics, including indication for vaccination, ongoing public health  
214 restrictions and predominant virus variants. With this in mind, we enrolled one-dose and two-dose  
215 Covid-19 vaccine cohorts covering from Jan 11, 2021 to Feb 28, 2021, and from March 22, 2021 to  
216 May 9, 2021 respectively. Participants with primary care records generated using the TTP software,  
217 which did not contain a specific vaccine type, were excluded.

### 218 ***Data sources***

#### 219 *Data linkage*

220 Several external data sources have been linked to UK Biobank to enable Covid-19 research, including  
221 primary care electronic health records, hospital admissions data from Hospital Episode Statistics  
222 (HES), and Covid-19 tests from Public Health England (PHE).<sup>24</sup> Data coverage for each data source is  
223 listed in the **Supplementary Methods**.

#### 224 *Vaccination status*

225 Vaccination status was obtained from GP prescription records, including the date of receipt of each  
226 dose and the vaccine brand. We used dm+d codes (Dictionary of medicines and devices used across  
227 the UK's National Health Service) to identify BNT162b2 [39115611000001103] and ChAdOx1  
228 [39114911000001105] Covid-19 vaccination.

#### 229 *Study outcomes*

230 In the UK, people at any age with any of these three Covid-19 symptoms (a high temperature, a new  
231 and continuous cough, or loss or change in the sense of smell or taste) are recommended to take a  
232 free Polymerase-chain-reaction (PCR) test by ordering a self-swab home PCR test kit or booking an  
233 appointment at a walk-in or drive-through test site. People could also access this service if they were  
234 at high risk of infection, e.g., close contact with a case (see <https://www.gov.uk/get-coronavirus-test>  
235 for details). All these tests were recorded by PHE and linked to UK Biobank, providing information on  
236 test dates and results. In this study, we defined infection as having a positive PCR test for SARS-CoV-  
237 2; and Covid-19 hospitalization (infection requiring hospital admission) based on the UKBB derived  
238 algorithm described in the **Supplementary Methods**.

#### 239 *Covariates*

240 We assessed multiple characteristics potentially associated with Covid-19 risk and/or vaccination,  
241 therefore considered as confounders. Study covariates included socio-demographics (age, sex,  
242 ethnicity), socio-economic status (index of multiple deprivations, education levels), physical  
243 measurements (body mass index), healthcare resource use (prescribed medications and the number  
244 of hospital admissions three years before the vaccination date), and comorbidities. The calendar

245 week of receipt of the Covid-19 vaccine was also included as it affected the probability of receiving  
246 different vaccines and infection risk (through changes in community transmission level).

#### 247 ***Statistical analyses***

248 The outcome risk assessment window for the one-dose cohort went from receiving the first dose to  
249 the earliest of outcome occurrence, receiving the second dose, or 14 weeks after the vaccination.  
250 For the two-dose cohort, follow-up was from receiving the second dose to outcome occurrence or  
251 end of the study (18/10/2021).

252 We used the propensity score-based inverse probability of treatment weighting (IPW) to minimise  
253 confounding.<sup>25</sup> The specification of propensity score modelling was described in **Supplementary**  
254 **Methods**. We generated Kaplan-Meier plots to depict the cumulative incidence of outcome over  
255 time in each cohort. We applied Cox proportional hazards regression with robust variance  
256 estimators to derive average hazard ratio (HR) and calculated incidence rates using weighted counts  
257 and follow-up time. We assessed the proportionality of hazards in the Cox models by visually  
258 inspecting scaled Schoenfeld residuals.

259 To evaluate for potential heterogeneity of the comparative effectiveness among specific  
260 demographic subgroups and overtime after the second dose, we performed several secondary  
261 analyses by including multiplicative interaction terms between the vaccine types and the following  
262 categories separately: age (50-75 years or > 75 years), sex (male or female), ethnicity (white or other  
263 ethnic groups), BMI (< 25 vs  $\geq$  25), and four weeks' consecutive time intervals.

264 We conducted the negative control experiment to assess potential residual (unobserved)  
265 confounding. Three clinical outcomes (limb pain, fracture, and peptic ulcer events) were pre-  
266 specified and should not be associated with vaccination status (BNT162b2 vs ChAdOx1) if potential  
267 confounders have been adequately controlled for.

268 Finally, we performed a sensitivity analysis using propensity score 1:1 matching without  
269 replacement. Specifically, we set a caliper of width equal to 0.2 of the standard deviation of the logit  
270 of the propensity score.<sup>26</sup> We used R version 3.5.1 for all analyses.

271 **Supplementary items**

272 **Supplementary Figure 1: The transmission dynamics of SARS-CoV-2 (A) and its dominant variants (B) during the study period.**

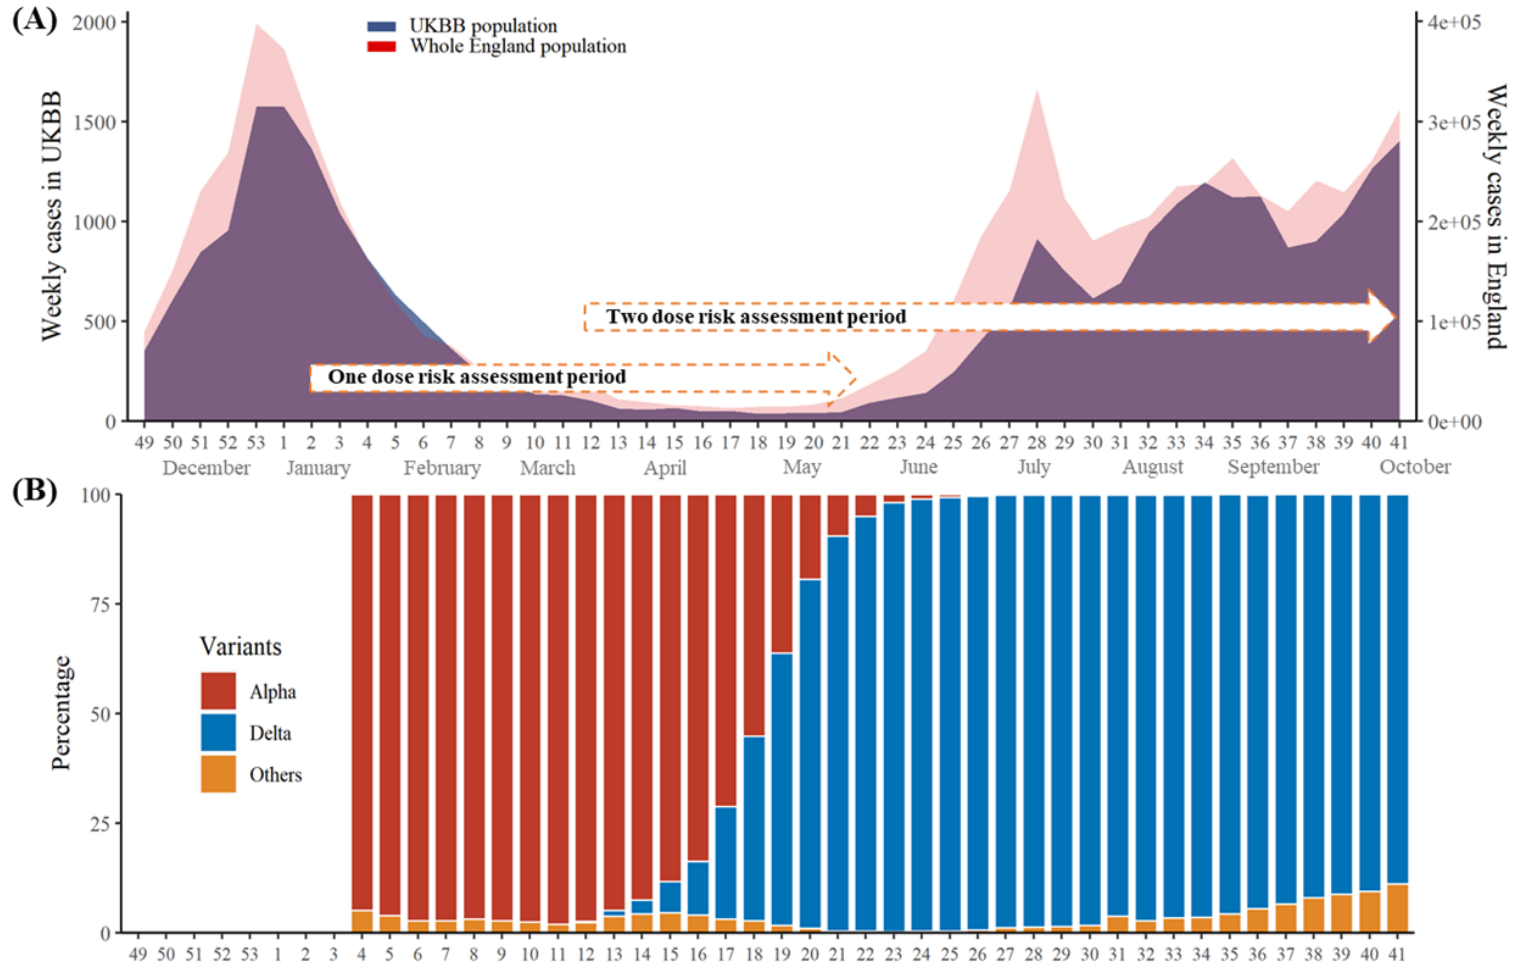

273 Notes: The data for weekly Covid-19 cases and SARS-CoV-2 variants of concern in England were from the Public Health England  
274 (<https://coronavirus.data.gov.uk/>).

**Supplementary Table 2: Baseline characteristics of the one dose cohorts.**

|                                      | Before weighting |              | After weighting |                 |
|--------------------------------------|------------------|--------------|-----------------|-----------------|
|                                      | BNT162b2         | ChAdOx1      | BNT162b2        | ChAdOx1         |
| Number                               | 70097            | 98551        | 167938          | 167917          |
| <b>Previous infection (%)</b>        | 1843 ( 2.6)      | 2649 ( 2.7)  | 4635.7 ( 2.8)   | 4662.1 ( 2.8)   |
| <b>Vaccination calendar week (%)</b> |                  |              |                 |                 |
| Week2                                | 12224 (17.4)     | 3127 ( 3.2)  | 15716.6 ( 9.4)  | 14681.5 ( 8.7)  |
| Week3                                | 15591 (22.2)     | 15728 (16.0) | 31194.2 (18.6)  | 31220.5 (18.6)  |
| Week4                                | 14783 (21.1)     | 16990 (17.2) | 32056.9 (19.1)  | 32096.3 (19.1)  |
| Week5                                | 7655 (10.9)      | 24264 (24.6) | 31629.9 (18.8)  | 31957.0 (19.0)  |
| Week6                                | 7573 (10.8)      | 19492 (19.8) | 26858.2 (16.0)  | 27070.1 (16.1)  |
| Week7                                | 5907 ( 8.4)      | 11282 (11.4) | 16731.3 (10.0)  | 17059.5 (10.2)  |
| Week8                                | 6364 ( 9.1)      | 7668 ( 7.8)  | 13751.8 ( 8.2)  | 13832.5 ( 8.2)  |
| <b>Demographics</b>                  |                  |              |                 |                 |
| Age, mean (sd)                       | 71.35 (7.21)     | 71.06 (6.02) | 71.09 (6.68)    | 71.11 (6.48)    |
| Sex, male (%)                        | 31203 (44.5)     | 43432 (44.1) | 74111.1 (44.1)  | 74156.6 (44.2)  |
| BMI, mean (sd)                       | 27.56 (4.78)     | 27.46 (4.76) | 27.51 (4.77)    | 27.51 (4.78)    |
| <b>Ethnicity (%)</b>                 |                  |              |                 |                 |
| Asian or Asian British               | 1479 ( 2.1)      | 1563 ( 1.6)  | 3112.1 ( 1.9)   | 3085.9 ( 1.8)   |
| Black or Black British               | 1136 ( 1.6)      | 1138 ( 1.2)  | 2311.8 ( 1.4)   | 2220.0 ( 1.3)   |
| Chinese                              | 224 ( 0.3)       | 263 ( 0.3)   | 478.5 ( 0.3)    | 481.6 ( 0.3)    |
| Do not know                          | 30 ( 0.0)        | 41 ( 0.0)    | 71.5 ( 0.0)     | 75.7 ( 0.0)     |
| Mixed                                | 397 ( 0.6)       | 460 ( 0.5)   | 851.1 ( 0.5)    | 840.7 ( 0.5)    |
| Other ethnic group                   | 657 ( 0.9)       | 703 ( 0.7)   | 1374.9 ( 0.8)   | 1363.6 ( 0.8)   |
| Prefer not to answer                 | 2248 ( 3.2)      | 3102 ( 3.1)  | 5267.6 ( 3.1)   | 5257.8 ( 3.1)   |
| White                                | 63926 (91.2)     | 91281 (92.6) | 154471.3 (92.0) | 154592.2 (92.1) |
| <b>Education (%)</b>                 |                  |              |                 |                 |
| None of the above                    | 12247 (17.5)     | 16502 (16.7) | 28750.7 (17.1)  | 28763.7 (17.1)  |
| Prefer not to answer                 | 2101 ( 3.0)      | 2323 ( 2.4)  | 4455.3 ( 2.7)   | 4320.0 ( 2.6)   |
| College or university degree         | 21484 (30.6)     | 31157 (31.6) | 52075.8 (31.0)  | 52190.1 (31.1)  |
| A levels as levels or equivalent     | 7498 (10.7)      | 11054 (11.2) | 18481.5 (11.0)  | 18474.9 (11.0)  |
| O levels gcs es or equivalent        | 14812 (21.1)     | 20890 (21.2) | 35573.0 (21.2)  | 35668.3 (21.2)  |

|                                                        |               |               |                |                |
|--------------------------------------------------------|---------------|---------------|----------------|----------------|
| Cs es or equivalent                                    | 3473 ( 5.0)   | 4776 ( 4.8)   | 8245.5 ( 4.9)  | 8268.9 ( 4.9)  |
| Nvq or hnd or hnc or equivalent                        | 4605 ( 6.6)   | 6501 ( 6.6)   | 11099.1 ( 6.6) | 11120.0 ( 6.6) |
| Other professional qualifications                      | 3877 ( 5.5)   | 5348 ( 5.4)   | 9257.9 ( 5.5)  | 9111.5 ( 5.4)  |
| <b>Indices of Multiple Deprivation, mean (sd)</b>      |               |               |                |                |
| Townsend deprivation index                             | 17.70 (13.96) | 16.49 (13.37) | 17.08 (13.57)  | 17.01 (13.73)  |
| Income score                                           | 0.12 (0.10)   | 0.11 (0.09)   | 0.11 (0.09)    | 0.11 (0.10)    |
| Employment score                                       | 0.09 (0.06)   | 0.08 (0.06)   | 0.09 (0.06)    | 0.09 (0.06)    |
| Health score                                           | -0.11 (0.89)  | -0.18 (0.88)  | -0.13 (0.89)   | -0.14 (0.89)   |
| Education score                                        | 14.61 (14.90) | 14.13 (14.83) | 14.40 (14.74)  | 14.39 (15.02)  |
| Housing score                                          | 19.94 (9.95)  | 19.80 (9.98)  | 19.70 (9.84)   | 19.69 (9.97)   |
| Crime score                                            | -0.04 (0.78)  | -0.09 (0.77)  | -0.07 (0.77)   | -0.07 (0.77)   |
| <b>Medications (past three years)</b>                  |               |               |                |                |
| Lipid lowering drugs                                   | 33093 (47.2)  | 43266 (43.9)  | 76151.4 (45.3) | 75957.6 (45.2) |
| RAS inhibitors                                         | 21956 (31.3)  | 29023 (29.4)  | 50602.1 (30.1) | 50609.0 (30.1) |
| Other anti-hypertensives                               | 11158 (15.9)  | 14517 (14.7)  | 25459.6 (15.2) | 25458.1 (15.2) |
| Proton pump inhibitors                                 | 30579 (43.6)  | 41572 (42.2)  | 72068.6 (42.9) | 71994.1 (42.9) |
| Diabetes medicines                                     | 6666 ( 9.5)   | 8288 ( 8.4)   | 14982.9 ( 8.9) | 14899.5 ( 8.9) |
| Antidepressants                                        | 14515 (20.7)  | 20199 (20.5)  | 34836.6 (20.7) | 34987.6 (20.8) |
| Systemic glucocorticoids                               | 9282 (13.2)   | 12919 (13.1)  | 22129.9 (13.2) | 22245.6 (13.2) |
| Antithrombotic                                         | 11799 (16.8)  | 15061 (15.3)  | 26856.6 (16.0) | 26832.6 (16.0) |
| Anticoagulants                                         | 3110 ( 4.4)   | 4020 ( 4.1)   | 7099.6 ( 4.2)  | 7130.8 ( 4.2)  |
| Immunosuppressants excl corticosteroids                | 1447 ( 2.1)   | 2017 ( 2.0)   | 3448.5 ( 2.1)  | 3492.0 ( 2.1)  |
| Antineoplastic agents                                  | 180 ( 0.3)    | 251 ( 0.3)    | 413.7 ( 0.2)   | 413.4 ( 0.2)   |
| <b>Hospital admission frequency (past three years)</b> | 1.38 (5.52)   | 1.34 (5.25)   | 1.37 (6.36)    | 1.37 (5.12)    |
| <b>Charlson comorbidity components (past years)</b>    |               |               |                |                |
| Diabetes (uncomplicated)                               | 9193 (13.1)   | 11657 (11.8)  | 20797.9 (12.4) | 20800.9 (12.4) |
| COPD                                                   | 14156 (20.2)  | 19433 (19.7)  | 33547.1 (20.0) | 33504.9 (20.0) |
| Chronic kidney disease                                 | 7449 (10.6)   | 9368 ( 9.5)   | 16714.7 (10.0) | 16713.1 (10.0) |
| Congestive heart failure                               | 1473 ( 2.1)   | 1893 ( 1.9)   | 3344.1 ( 2.0)  | 3370.8 ( 2.0)  |
| Cancer                                                 | 10807 (15.4)  | 14483 (14.7)  | 25028.3 (14.9) | 24975.7 (14.9) |
| Dementia                                               | 681 ( 1.0)    | 959 ( 1.0)    | 1731.3 ( 1.0)  | 1827.9 ( 1.1)  |
| Cerebrovascular disease                                | 2799 ( 4.0)   | 3498 ( 3.5)   | 6356.5 ( 3.8)  | 6324.4 ( 3.8)  |
| Diabetes (end-organ damage)                            | 3821 ( 5.5)   | 4755 ( 4.8)   | 8556.7 ( 5.1)  | 8526.5 ( 5.1)  |



|                                    |             |             |               |               |
|------------------------------------|-------------|-------------|---------------|---------------|
| Peripheral vascular disease        | 1459 ( 2.1) | 1857 ( 1.9) | 3276.3 ( 2.0) | 3287.2 ( 2.0) |
| Liver disease (moderate to severe) | 279 ( 0.4)  | 384 ( 0.4)  | 631.3 ( 0.4)  | 646.1 ( 0.4)  |
| Peptic ulcer                       | 2151 ( 3.1) | 2877 ( 2.9) | 5081.0 ( 3.0) | 5018.4 ( 3.0) |
| Rheumatoid arthritis               | 3118 ( 4.4) | 4177 ( 4.2) | 7266.1 ( 4.3) | 7265.0 ( 4.3) |
| Myocardial infarction              | 2573 ( 3.7) | 3254 ( 3.3) | 5890.7 ( 3.5) | 5866.9 ( 3.5) |
| AIDS                               | 137 ( 0.2)  | 183 ( 0.2)  | 320.8 ( 0.2)  | 310.5 ( 0.2)  |
| Malignant cancer                   | 370 ( 0.5)  | 502 ( 0.5)  | 859.2 ( 0.5)  | 836.4 ( 0.5)  |
| Liver disease (mild)               | 452 ( 0.6)  | 650 ( 0.7)  | 1105.4 ( 0.7) | 1110.2 ( 0.7) |
| Hemiplegia                         | 98 ( 0.1)   | 147 ( 0.1)  | 263.2 ( 0.2)  | 250.8 ( 0.1)  |

276

277

278

**Supplementary Table 3: Baseline characteristics of the two dose cohorts.**

|                                      | Before weighting |              | After weighting |                 |
|--------------------------------------|------------------|--------------|-----------------|-----------------|
|                                      | BNT162b2         | ChAdOx1      | BNT162b2        | ChAdOx1         |
| Number                               | 67813            | 89030        | 156301          | 156952          |
| <b>Previous infection (%)</b>        | 2539 ( 2.9)      | 1818 ( 2.7)  | 4518.5 ( 2.9)   | 4498.7 ( 2.9)   |
| <b>Vaccination calendar week (%)</b> |                  |              |                 |                 |
| Week12                               | 8299 (12.2)      | 3972 ( 4.5)  | 12366.1 ( 7.9)  | 12606.7 ( 8.0)  |
| Week13                               | 13558 (20.0)     | 4373 ( 4.9)  | 18073.8 (11.6)  | 17812.4 (11.3)  |
| Week14                               | 12976 (19.1)     | 13900 (15.6) | 26803.0 (17.1)  | 26791.8 (17.1)  |
| Week15                               | 13365 (19.7)     | 16445 (18.5) | 29957.9 (19.2)  | 29935.1 (19.1)  |
| Week16                               | 6892 (10.2)      | 21591 (24.3) | 28278.7 (18.1)  | 28468.5 (18.1)  |
| Week17                               | 7037 (10.4)      | 16945 (19.0) | 23698.1 (15.2)  | 23941.3 (15.3)  |
| Week18                               | 5686 ( 8.4)      | 11804 (13.3) | 17123.5 (11.0)  | 17396.8 (11.1)  |
| <b>Demographics</b>                  |                  |              |                 |                 |
| Age, mean (sd)                       | 72.47 (6.97)     | 71.51 (5.98) | 71.80 (6.74)    | 71.81 (6.18)    |
| Sex, male (%)                        | 29825 (44.0)     | 39250 (44.1) | 68880.5 (44.1)  | 69199.6 (44.1)  |
| BMI, mean (sd)                       | 27.47 (4.67)     | 27.46 (4.74) | 27.50 (4.72)    | 27.50 (4.75)    |
| <b>Ethnicity (%)</b>                 |                  |              |                 |                 |
| Asian or Asian British               | 1279 ( 1.9)      | 1348 ( 1.5)  | 2656.8 ( 1.7)   | 2641.7 ( 1.7)   |
| Black or Black British               | 924 ( 1.4)       | 969 ( 1.1)   | 1957.9 ( 1.3)   | 1921.4 ( 1.2)   |
| Chinese                              | 185 ( 0.3)       | 225 ( 0.3)   | 405.8 ( 0.3)    | 409.4 ( 0.3)    |
| Do not know                          | 26 ( 0.0)        | 37 ( 0.0)    | 68.3 ( 0.0)     | 66.4 ( 0.0)     |
| Mixed                                | 345 ( 0.5)       | 408 ( 0.5)   | 730.0 ( 0.5)    | 735.3 ( 0.5)    |
| Other ethnic group                   | 560 ( 0.8)       | 613 ( 0.7)   | 1182.2 ( 0.8)   | 1171.0 ( 0.7)   |
| Prefer not to answer                 | 2143 ( 3.2)      | 2737 ( 3.1)  | 4807.1 ( 3.1)   | 4881.0 ( 3.1)   |
| White                                | 62351 (91.9)     | 82693 (92.9) | 144492.9 (92.4) | 145126.1 (92.5) |
| <b>Education (%)</b>                 |                  |              |                 |                 |
| None of the above                    | 12648 (18.7)     | 15435 (17.3) | 28036.2 (17.9)  | 28234.6 (18.0)  |
| Prefer not to answer                 | 2031 ( 3.0)      | 2116 ( 2.4)  | 4097.4 ( 2.6)   | 4059.5 ( 2.6)   |
| College or university degree         | 20513 (30.2)     | 27567 (31.0) | 47638.2 (30.5)  | 47836.8 (30.5)  |
| A levels as levels or equivalent     | 7069 (10.4)      | 9848 (11.1)  | 16888.3 (10.8)  | 16951.9 (10.8)  |
| O levels gcs es or equivalent        | 14183 (20.9)     | 19030 (21.4) | 33181.6 (21.2)  | 33314.8 (21.2)  |

|                                                        |               |               |                |                |
|--------------------------------------------------------|---------------|---------------|----------------|----------------|
| Cs es or equivalent                                    | 2970 ( 4.4)   | 4142 ( 4.7)   | 7166.0 ( 4.6)  | 7180.5 ( 4.6)  |
| Nvq or hnd or hnc or equivalent                        | 4440 ( 6.5)   | 5916 ( 6.6)   | 10415.2 ( 6.7) | 10483.2 ( 6.7) |
| Other professional qualifications                      | 3959 ( 5.8)   | 4976 ( 5.6)   | 8878.2 ( 5.7)  | 8891.1 ( 5.7)  |
| <b>Indices of Multiple Deprivation, mean (sd)</b>      |               |               |                |                |
| Townsend deprivation index                             | 17.35 (13.69) | 16.39 (13.27) | 17.00 (13.51)  | 16.97 (13.62)  |
| Income score                                           | 0.11 (0.09)   | 0.11 (0.09)   | 0.11 (0.09)    | 0.11 (0.09)    |
| Employment score                                       | 0.09 (0.06)   | 0.08 (0.06)   | 0.09 (0.06)    | 0.09 (0.06)    |
| Health score                                           | -0.12 (0.89)  | -0.18 (0.88)  | -0.14 (0.88)   | -0.14 (0.88)   |
| Education score                                        | 14.39 (14.77) | 14.10 (14.80) | 14.35 (14.72)  | 14.35 (14.96)  |
| Housing score                                          | 19.85 (9.90)  | 19.66 (9.92)  | 19.64 (9.80)   | 19.66 (9.97)   |
| Crime score                                            | -0.05 (0.78)  | -0.09 (0.77)  | -0.07 (0.77)   | -0.07 (0.77)   |
| <b>Medications (past three years)</b>                  |               |               |                |                |
| Lipid lowering drugs                                   | 33138 (48.9)  | 40248 (45.2)  | 73220.9 (46.8) | 73457.8 (46.8) |
| RAS inhibitors                                         | 21768 (32.1)  | 26794 (30.1)  | 48369.8 (30.9) | 48521.5 (30.9) |
| Other anti-hypertensives                               | 11297 (16.7)  | 13489 (15.2)  | 24636.9 (15.8) | 24732.6 (15.8) |
| Proton pump inhibitors                                 | 30074 (44.3)  | 38128 (42.8)  | 68201.9 (43.6) | 68396.9 (43.6) |
| Diabetes medicines                                     | 6168 ( 9.1)   | 7556 ( 8.5)   | 13866.2 ( 8.9) | 13854.3 ( 8.8) |
| Antidepressants                                        | 13877 (20.5)  | 18277 (20.5)  | 32391.9 (20.7) | 32511.1 (20.7) |
| Systemic glucocorticoids                               | 9126 (13.5)   | 11585 (13.0)  | 20797.3 (13.3) | 20784.2 (13.2) |
| Antithrombotic                                         | 11903 (17.6)  | 14077 (15.8)  | 26024.1 (16.6) | 26049.1 (16.6) |
| Anticoagulants                                         | 3392 ( 5.0)   | 3969 ( 4.5)   | 7289.0 ( 4.7)  | 7271.8 ( 4.6)  |
| Immunosuppressants excl corticosteroids                | 1357 ( 2.0)   | 1823 ( 2.0)   | 3216.2 ( 2.1)  | 3222.4 ( 2.1)  |
| Antineoplastic agents                                  | 185 ( 0.3)    | 232 ( 0.3)    | 411.4 ( 0.3)   | 398.8 ( 0.3)   |
| <b>Hospital admission frequency (past three years)</b> | 1.39 (5.82)   | 1.32 (5.02)   | 1.37 (6.36)    | 1.36 (4.89)    |
| <b>Charlson comorbidity components (past years)</b>    |               |               |                |                |
| Diabetes (uncomplicated)                               | 8663 (12.8)   | 10667 (12.0)  | 19443.3 (12.4) | 19495.5 (12.4) |
| COPD                                                   | 13737 (20.3)  | 17715 (19.9)  | 31566.4 (20.2) | 31582.3 (20.1) |
| Chronic kidney disease                                 | 7746 (11.4)   | 8924 (10.0)   | 16513.0 (10.6) | 16558.8 (10.6) |
| Congestive heart failure                               | 1548 ( 2.3)   | 1814 ( 2.0)   | 3355.0 ( 2.1)  | 3359.2 ( 2.1)  |
| Cancer                                                 | 10937 (16.1)  | 13601 (15.3)  | 24305.2 (15.6) | 24366.2 (15.5) |
| Dementia                                               | 820 ( 1.2)    | 1004 ( 1.1)   | 1871.1 ( 1.2)  | 1942.2 ( 1.2)  |
| Cerebrovascular disease                                | 2860 ( 4.2)   | 3327 ( 3.7)   | 6199.3 ( 4.0)  | 6173.1 ( 3.9)  |
| Diabetes (end-organ damage)                            | 3638 ( 5.4)   | 4411 ( 5.0)   | 8099.5 ( 5.2)  | 8084.2 ( 5.2)  |

|                                    |             |             |               |               |
|------------------------------------|-------------|-------------|---------------|---------------|
| Peripheral vascular disease        | 1513 ( 2.2) | 1760 ( 2.0) | 3258.4 ( 2.1) | 3256.7 ( 2.1) |
| Liver disease (moderate to severe) | 258 ( 0.4)  | 348 ( 0.4)  | 605.6 ( 0.4)  | 606.2 ( 0.4)  |
| Peptic ulcer                       | 2190 ( 3.2) | 2684 ( 3.0) | 4912.0 ( 3.1) | 4898.0 ( 3.1) |
| Rheumatoid arthritis               | 3225 ( 4.8) | 3939 ( 4.4) | 7172.6 ( 4.6) | 7153.7 ( 4.6) |
| Myocardial infarction              | 2541 ( 3.7) | 3053 ( 3.4) | 5663.6 ( 3.6) | 5663.5 ( 3.6) |
| AIDS                               | 131 ( 0.2)  | 164 ( 0.2)  | 294.3 ( 0.2)  | 288.0 ( 0.2)  |
| Malignant cancer                   | 352 ( 0.5)  | 462 ( 0.5)  | 789.2 ( 0.5)  | 804.3 ( 0.5)  |
| Liver disease (mild)               | 421 ( 0.6)  | 579 ( 0.7)  | 1005.7 ( 0.6) | 1022.9 ( 0.7) |
| Hemiplegia                         | 90 ( 0.1)   | 123 ( 0.1)  | 225.5 ( 0.1)  | 222.0 ( 0.1)  |

280

281

282 **Supplementary Table 4: Sensitivity analysis (propensity score matching)**

|                          | BNT162b2 vs ChAdOx1 |            |            |                    |
|--------------------------|---------------------|------------|------------|--------------------|
|                          | Number              | Events     | Incidence  | HRs                |
| After first-dose         |                     |            |            |                    |
| Covid-19 infection       | 58676/ 58676        | 154/ 193   | 12.6/ 15.7 | 0.80 (0.65 - 0.99) |
| Covid-19 hospitalization | 58676/ 58676        | 29/ 32     | 2.36/ 2.60 | 0.91 (0.55 - 1.51) |
| After second-dose        |                     |            |            |                    |
| Covid-19 infection       | 54422/ 54422        | 1089/ 1582 | 39.5/ 57.6 | 0.69 (0.63 - 0.74) |
| Covid-19 hospitalization | 54422/ 54422        | 93/ 142    | 3.35/ 5.13 | 0.65 (0.50 - 0.85) |

283

284

285 **Supplementary Methods**  
 286 **Sources and timelines for data availability**

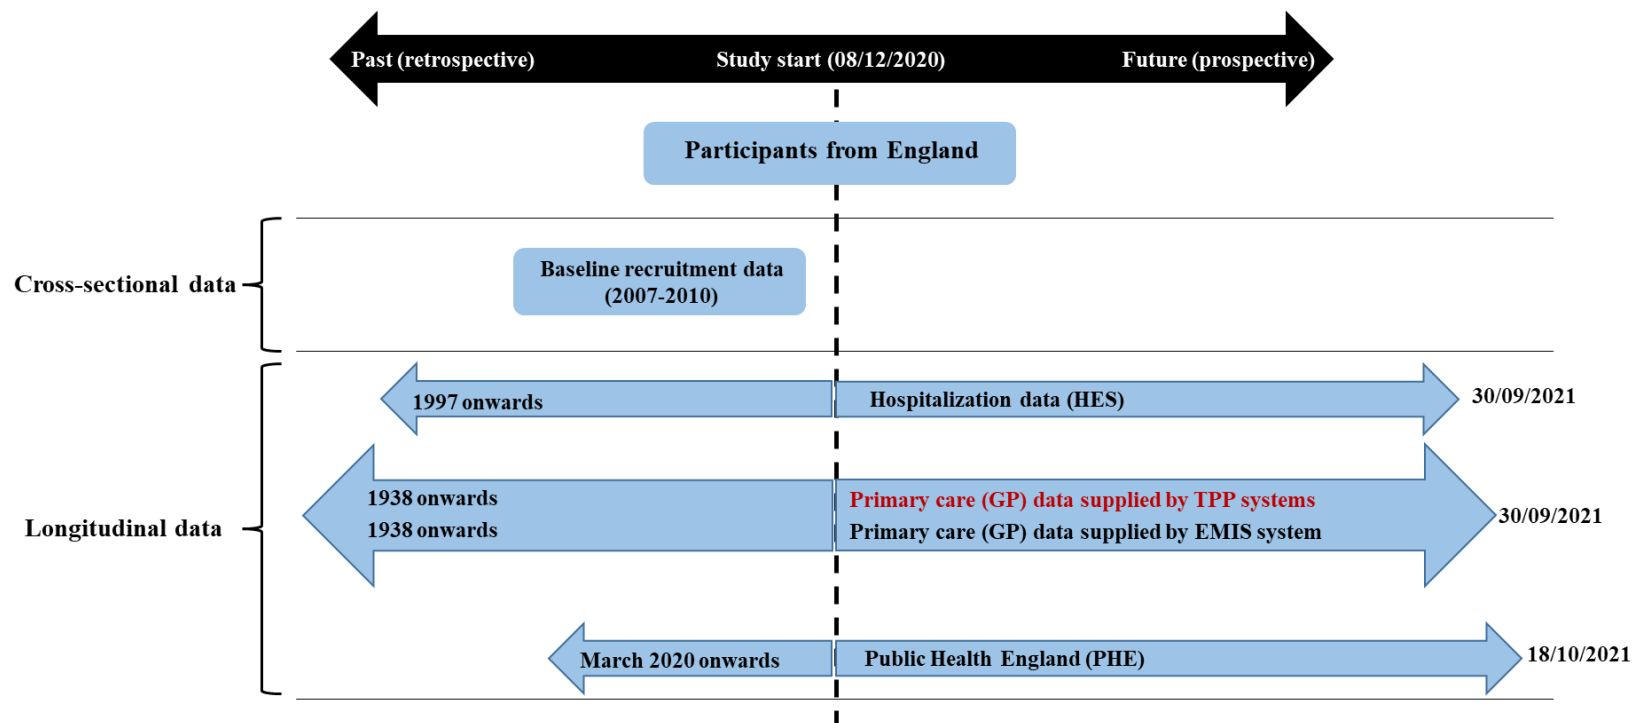

287

288 The baseline recruitment data includes detailed demographic, socioeconomic, lifestyle factors, and physical activities information. The HES data includes  
 289 hospital administration, operations and diagnoses information. The GP data includes diagnoses and prescription information. Of note, the Covid-19  
 290 vaccination has been integrated into EMIS GP's prescription records but not into the TPP. The PHE data includes Covid-19 test results.

291

292 **Construction of the inpatient indicator for UKBB participants**

293 The construction of the "origin" field is based on information provided on the specimen request form. If the specimen was marked as being from an acute  
 294 (emergency) care provider, an A&E department, an inpatient location, or resulted from health care associated infection, it is recorded by PHE as an  
 295 inpatient sample. Tests marked as being from "Healthcare Worker Testing" are never recorded as inpatient samples, though some may also carry an acute  
 flag.

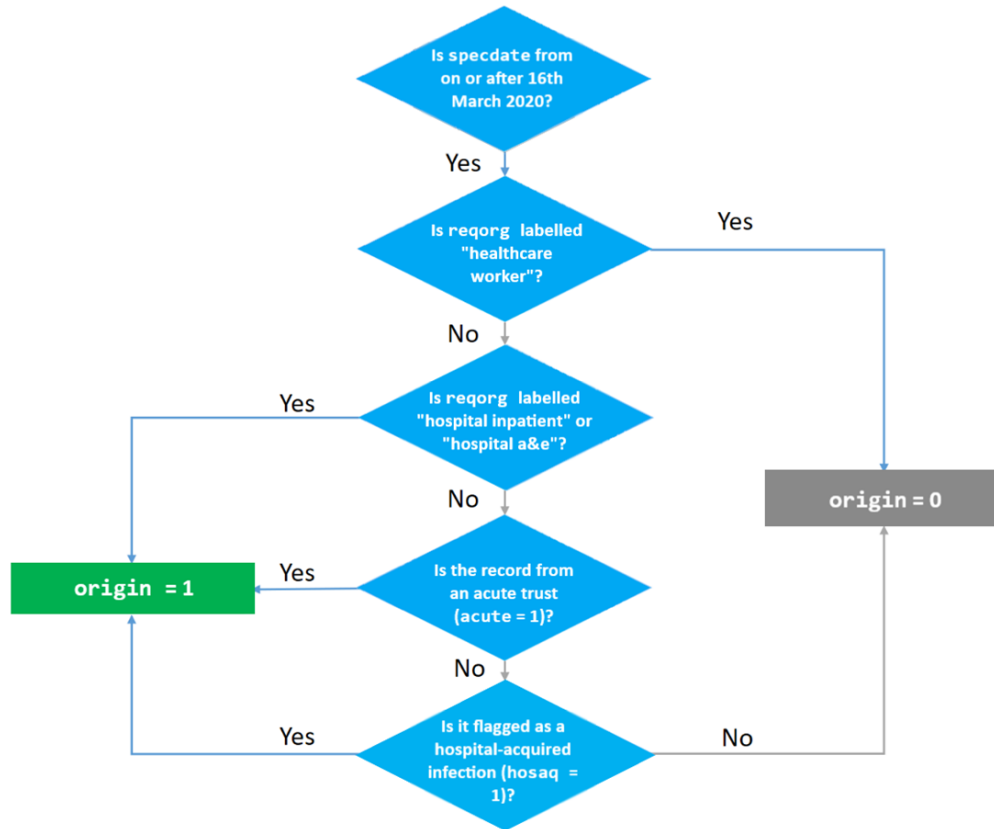

The aim of designating inpatient status for the SARS-CoV-2 test was to indicate severity of Covid-19 infection. SARS-CoV-2 tests taken in hospital can be undertaken for several reasons including symptomatic patients requiring hospital admission, or general inpatient screening, which includes asymptomatic patients. Furthermore, the algorithm used to flag inpatient status may not necessarily indicate inpatient care in all cases. For example, some tests flagged as coming from "acute" trusts will likely not be inpatients, since these trusts may also perform tests on behalf of GPs and others, and tests requested by A&E may be for patients who are not then admitted.

The flow chart below illustrates the logic used by PHE to generate an indicator of whether a test result was obtained from a hospital inpatient or not (depicted as the "origin" field in the covid19\_result table). The fields used to construct the "origin" field have also been released to enable researchers to replicate it and construct their own alternatives if desired.

PHE's designation of inpatient status can be compared to hospital episodes statistics (HES) dates of admission and discharge made by NHS trusts. A comparison between SARS-CoV-2 positive inpatient status versus inpatient diagnosis codes (ICD-10 diagnosis codes U071 or U072) for Covid-19 (from HES) can also be made. For

319 further details, see the following webpage: <https://news.bugbank.uk/2020/08/identifying-inpatients-comparison-to.html>.

320

321 **Propensity score modelling and inverse probability of treatment weighting**

322 We calculated propensity scores for a vaccination with BNT162b2 against ChAdOx1 using logistic regression. The variables included in the model were  
323 previous Covid-19 infection status (binary), age on the vaccination date (continuous linear), sex (binary), ethnicity (categorical, collected at the UK Biobank  
324 recruitment), multiple socio-economic deprivation scores (Townsend deprivation index, income score, employment score, health score, education score,  
325 housing score, and crime score; continuous linear, collected at the UK Biobank recruitment), education levels (categorical, collected at the UK Biobank  
326 recruitment), body mass index (continuous linear, collected at the UK Biobank recruitment), a list of pre-specified medications (binary, obtained from  
327 primary care prescription records), the number of hospital admissions (continuous linear, obtained from HES), and comorbidities (binary, obtained from  
328 primary care diagnosis records). The weights for each participant were then computed based on the Rosenbaum formula:  $W_i = \frac{Z_i}{e_i} + \frac{(1-Z_i)}{(1-e_i)}$ .<sup>27</sup> To reduce  
329 unstable estimate due to extreme weights in the tails of the propensity score distribution, we used asymmetric trimming to exclude people whose  
330 propensity score was below the 1<sup>th</sup> percentile of the propensity score of the BNT162b2 cohort and above the 99<sup>th</sup> percentile of the propensity score of the  
331 ChAdOx1 cohort.<sup>28</sup>

332

333



334 **Acknowledgements and funding**

335 DPA is funded through an NIHR Senior Research Fellowship (Grant number SRF-2018-11-ST2-004).  
336 The views expressed in this publication are those of the author(s) and not necessarily those of the  
337 NHS, the National Institute for Health Research or the Department of Health. Mr Junqing Xie has  
338 been awarded a Jardine-Oxford Graduate Scholarship and a titular Clarendon Fund Scholarship  
339 outside the submitted work. AP-U is supported by the Medical Research Council (grant numbers  
340 MR/K501256/1, MR/N013468/1).

341

342 **Conflict of Interests Statement**

343 Dr Prieto-Alhambra reported receiving grant support from Les Laboratoires Servier; that his research  
344 group has received grants and advisory or speaker fees from Amgen, Astellas, AstraZeneca, Chesi-  
345 Taylor, Johnson and Johnson and UCD; and that Janssen, on behalf of Innovative Medicines  
346 Initiative-funded European Health Data Evidence Network and European Medical Information  
347 Framework consortium and Synapse Management Partners, has supported training programs, open  
348 to external participants, organized by his department. Others have nothing to disclose.

349

350

351

## 352 References

- 353 **1** Polack FP, Thomas SJ, Kitchin N, et al. Safety and Efficacy of the BNT162b2 mRNA Covid-19  
354 Vaccine. *N Engl J Med.* 2020;383(27):2603-2615. doi:10.1056/NEJMoa2034577.
- 355 **2** Baden LR, El Sahly HM, Essink B, et al. Efficacy and Safety of the mRNA-1273 SARS-CoV-2  
356 Vaccine. *N Engl J Med.* 2020;384(5):403-416. doi:10.1056/NEJMoa2035389.
- 357 **3** Voysey M, Clemens SAC, Madhi SA, et al. Safety and efficacy of the ChAdOx1 nCoV-19 vaccine  
358 (AZD1222) against SARS-CoV-2: an interim analysis of four randomised controlled trials in Brazil,  
359 South Africa, and the UK. *The Lancet.* 2020;397(10269):99-111. doi:10.1016/S0140-  
360 6736(20)32661-1.
- 361 **4** Sadoff J, Gray G, van VandeBosch, et al. Safety and Efficacy of Single-Dose Ad26.COV2.S Vaccine  
362 against Covid-19. *N Engl J Med.* 2021;384(23):2187-2201. doi:10.1056/NEJMoa2101544.
- 363 **5** Dagan N, Barda N, Kepten E, et al. BNT162b2 mRNA Covid-19 Vaccine in a Nationwide Mass  
364 Vaccination Setting. *N Engl J Med.* 2021;384(15):1412-1423. doi:10.1056/NEJMoa2101765.
- 365 **6** Vasileiou E, Simpson CR, Shi T, et al. Interim findings from first-dose mass COVID-19 vaccination  
366 roll-out and COVID-19 hospital admissions in Scotland: a national prospective cohort study. *The*  
367 *Lancet.* 2021;397(10285):1646-1657. doi:10.1016/S0140-6736(21)00677-2.
- 368 **7** Pijls BG, Jolani S, Atherley A, et al. Demographic risk factors for COVID-19 infection, severity,  
369 ICU admission and death: a meta-analysis of 59 studies. *BMJ Open.* 2021;11(1):e044640.  
370 doi:10.1136/bmjopen-2020-044640.
- 371 **8** Peckham H, Gruijter NM de, Raine C, et al. Male sex identified by global COVID-19 meta-  
372 analysis as a risk factor for death and ICU admission. *Nat Commun.* 2020;11(1):6317.  
373 doi:10.1038/s41467-020-19741-6.
- 374 **9** Mathur R, Rentsch CT, Morton CE, et al. Ethnic differences in SARS-CoV-2 infection and COVID-  
375 19-related hospitalisation, intensive care unit admission, and death in 17 million adults in  
376 England: an observational cohort study using the OpenSAFELY platform. *The Lancet.*  
377 2021;397(10286):1711-1724. doi:10.1016/S0140-6736(21)00634-6.
- 378 **10** Recalde M, Pistillo A, Fernandez-Bertolin S, et al. Body Mass Index and Risk of COVID-19  
379 Diagnosis, Hospitalization, and Death: A Cohort Study of 2 524 926 Catalans. *J Clin Endocrinol*  
380 *Metab.* 2021;106(12):e5030-e5042. doi:10.1210/clinem/dgab546.
- 381 **11** Liu X, Shaw RH, Stuart ASV, et al. Safety and immunogenicity of heterologous versus  
382 homologous prime-boost schedules with an adenoviral vectored and mRNA COVID-19 vaccine  
383 (Com-COV): a single-blind, randomised, non-inferiority trial. *The Lancet.* 2021;398(10303):856-  
384 869. doi:10.1016/S0140-6736(21)01694-9.
- 385 **12** Duarte-Salles T, Prieto-Alhambra D. Heterologous vaccine regimens against COVID-19. *The*  
386 *Lancet.* 2021;398(10295):94-95. doi:10.1016/S0140-6736(21)01442-2.
- 387 **13** Borobia AM, Carcas AJ, Pérez-Olmeda M, et al. Immunogenicity and reactogenicity of  
388 BNT162b2 booster in ChAdOx1-S-primed participants (CombiVacS): a multicentre, open-label,  
389 randomised, controlled, phase 2 trial. *The Lancet.* 2021;398(10295):121-130.  
390 doi:10.1016/S0140-6736(21)01420-3.
- 391 **14** Hulme WJ, Williamson EJ, Green A, et al. Comparative effectiveness of ChAdOx1 versus  
392 BNT162b2 COVID-19 vaccines in Health and Social Care workers in England: a cohort study  
393 using OpenSAFELY. *medRxiv.* 2021:2021.10.13.21264937. doi:10.1101/2021.10.13.21264937.
- 394 **15** Fry A, Littlejohns TJ, Sudlow C, et al. Comparison of Sociodemographic and Health-Related  
395 Characteristics of UK Biobank Participants With Those of the General Population. *American*  
396 *Journal of Epidemiology.* 2017;186(9):1026-1034. doi:10.1093/aje/kwx246.
- 397 **16** Cromer D, Steain M, Reynaldi A, et al. SARS-CoV-2 variants: levels of neutralisation required for  
398 protective immunity; 2021.

- 399 **17** Bernal JL, Andrews N, Gower C, et al. *Effectiveness of COVID-19 vaccines against the B.1.617.2*  
400 *variant; 2021.*
- 401 **18** Lewnard JA, Patel MM, Jewell NP, et al. Theoretical Framework for Retrospective Studies of the  
402 Effectiveness of SARS-CoV-2 Vaccines. *Epidemiology (Cambridge, Mass.)*. 2021;32(4):508-517.  
403 doi:10.1097/EDE.0000000000001366.
- 404 **19** King C, Beard J, Crampin AC, et al. Methodological challenges in measuring vaccine  
405 effectiveness using population cohorts in low resource settings. *Vaccine*. 2015;33(38):4748-  
406 4755. doi:10.1016/j.vaccine.2015.07.062.
- 407 **20** UK COVID-19 vaccines delivery plan.  
408 [https://assets.publishing.service.gov.uk/government/uploads/system/uploads/attachment\\_data/file/951928/uk-covid-19-vaccines-delivery-plan-final.pdf](https://assets.publishing.service.gov.uk/government/uploads/system/uploads/attachment_data/file/951928/uk-covid-19-vaccines-delivery-plan-final.pdf). Accessed September 27, 2021.
- 409 **21** Regulatory approval of Pfizer/BioNTech vaccine for COVID-19. *GOV.UK*. Updated December 2,  
410 2020. [https://www.gov.uk/government/publications/regulatory-approval-of-pfizer-biontech-](https://www.gov.uk/government/publications/regulatory-approval-of-pfizer-biontech-vaccine-for-covid-19)  
411 [vaccine-for-covid-19](https://www.gov.uk/government/publications/regulatory-approval-of-pfizer-biontech-vaccine-for-covid-19). Accessed September 27, 2021.
- 412 **22** Regulatory approval of Vaxzevria (previously COVID-19 Vaccine AstraZeneca). *GOV.UK*. Updated  
413 December 30, 2020. [https://www.gov.uk/government/publications/regulatory-approval-of-](https://www.gov.uk/government/publications/regulatory-approval-of-covid-19-vaccine-astrazeneca)  
414 [covid-19-vaccine-astrazeneca](https://www.gov.uk/government/publications/regulatory-approval-of-covid-19-vaccine-astrazeneca). Accessed September 27, 2021.
- 415 **23** Bycroft C, Freeman C, Petkova D, et al. The UK Biobank resource with deep phenotyping and  
416 genomic data. *Nature*. 2018;562(7726):203-209. doi:10.1038/s41586-018-0579-z.
- 417 **24** Armstrong J, Rudkin JK, Allen N, et al. Dynamic linkage of COVID-19 test results between Public  
418 Health England's Second Generation Surveillance System and UK Biobank. *Microbial Genomics*.  
419 2020;6(7). doi:10.1099/mgen.0.000397.
- 420 **25** Austin PC. An Introduction to Propensity Score Methods for Reducing the Effects of  
421 Confounding in Observational Studies. *Multivariate Behavioral Research*. 2011;46(3):399-424.  
422 doi:10.1080/00273171.2011.568786.
- 423 **26** Wang Y, Cai H, Li C, et al. Optimal caliper width for propensity score matching of three  
424 treatment groups: a Monte Carlo study. *PLOS ONE*. 2013;8(12):e81045.  
425 doi:10.1371/journal.pone.0081045.
- 426 **27** Austin PC, Stuart EA. The performance of inverse probability of treatment weighting and full  
427 matching on the propensity score in the presence of model misspecification when estimating  
428 the effect of treatment on survival outcomes. *Stat Methods Med Res*. 2017;26(4):1654-1670.  
429 doi:10.1177/0962280215584401.
- 430 **28** Stürmer T, Rothman KJ, Avorn J, Glynn RJ. Treatment effects in the presence of unmeasured  
431 confounding: dealing with observations in the tails of the propensity score distribution--a  
432 simulation study. *American Journal of Epidemiology*. 2010;172(7):843-854.  
433 doi:10.1093/aje/kwq198.
- 434  
435
